# Supplementary material for: fMRI Neurofeedback Training for Increasing Anterior Cingulate Cortex Activation in Adult Attention Deficit Hyperactivity Disorder. An Exploratory Randomized, Single-Blinded Study
Source: PubMed Central journal article supplement (PMC5270326; doi:10.1371/journal.pone.0170795), 2017-01-26
Supplement: pone.0170795.s009.pdf [file pone.0170795.s009.pdf]

---

**Neurofeedback group**

|             | session 1 |           |           | session 2 |           |           | session 3 |           |           | session 4 |           |           | session 1-4 |           |           |
|-------------|-----------|-----------|-----------|-----------|-----------|-----------|-----------|-----------|-----------|-----------|-----------|-----------|-------------|-----------|-----------|
|             | x         | y         | z         | x         | y         | z         | x         | y         | z         | x         | y         | z         | x           | y         | z         |
| S11         | 6         | 21        | 41        | -1        | 16        | 41        | -7        | 15        | 38        | -2        | 17        | 41        | -1          | 17        | 40        |
| S12         | 9         | 12        | 42        | 8         | 17        | 39        | 8         | 10        | 41        | 4         | 9         | 41        | 7           | 12        | 41        |
| S13         | 3         | 14        | 40        | -2        | 12        | 41        | -3        | 12        | 44        |           |           |           | -1          | 13        | 42        |
| S14         | -3        | 24        | 43        | -3        | 23        | 44        | -4        | 1         | 49        | -4        | 2         | 46        | -4          | 13        | 46        |
| S15         | 4         | 15        | 41        | -3        | 23        | 38        | 1         | 16        | 41        | -1        | 18        | 39        | 0           | 18        | 40        |
| S16         | 3         | 21        | 38        | 3         | 20        | 35        | 6         | 23        | 34        | 8         | 22        | 34        | 5           | 22        | 35        |
| S17         | 1         | 6         | 31        | 10        | 6         | 34        | 3         | 19        | 34        | 2         | 12        | 34        | 4           | 11        | 33        |
| <b>mean</b> | <b>3</b>  | <b>16</b> | <b>39</b> | <b>2</b>  | <b>17</b> | <b>39</b> | <b>1</b>  | <b>14</b> | <b>40</b> | <b>1</b>  | <b>13</b> | <b>39</b> | <b>2</b>    | <b>15</b> | <b>39</b> |
| SD          | 4         | 6         | 4         | 5         | 6         | 4         | 6         | 7         | 5         | 4         | 7         | 5         | 4           | 4         | 4         |

**Control group**

|             | session 1 |           |           | session 2 |           |           | session 3 |           |           | session 4 |           |           | session 1-4 |           |           |
|-------------|-----------|-----------|-----------|-----------|-----------|-----------|-----------|-----------|-----------|-----------|-----------|-----------|-------------|-----------|-----------|
|             | x         | y         | z         | x         | y         | z         | x         | y         | z         | x         | y         | z         | x           | y         | z         |
| S21         | 1         | 18        | 41        | -1        | 13        | 35        | 4         | 14        | 39        | 3         | 11        | 44        | 2           | 14        | 40        |
| S22         | 8         | 22        | 31        | 5         | 8         | 28        | 5         | 27        | 39        |           |           |           | 6           | 19        | 33        |
| S23         | 5         | 14        | 40        | 5         | 10        | 42        | 4         | 21        | 37        | 7         | 13        | 41        | 5           | 15        | 40        |
| S24         | -7        | 25        | 30        | -3        | 22        | 38        | -8        | 11        | 47        | -4        | 23        | 30        | -6          | 20        | 36        |
| S25         | -6        | 1         | 29        | -5        | 5         | 34        | -4        | 7         | 35        | -7        | 10        | 35        | -6          | 6         | 33        |
| S26         | 1         | 26        | 35        | 5         | 19        | 32        | 4         | 29        | 32        | 11        | 11        | 38        | 5           | 21        | 34        |
| <b>mean</b> | <b>0</b>  | <b>18</b> | <b>34</b> | <b>1</b>  | <b>13</b> | <b>35</b> | <b>1</b>  | <b>18</b> | <b>38</b> | <b>2</b>  | <b>14</b> | <b>38</b> | <b>1</b>    | <b>16</b> | <b>36</b> |
| SD          | 6         | 9         | 5         | 5         | 7         | 5         | 5         | 9         | 5         | 7         | 5         | 5         | 5           | 6         | 3         |

---
