# Supplementary material for: fMRI Neurofeedback Training for Increasing Anterior Cingulate Cortex Activation in Adult Attention Deficit Hyperactivity Disorder. An Exploratory Randomized, Single-Blinded Study
Source: PubMed Central journal article supplement (PMC5270326; doi:10.1371/journal.pone.0170795), 2017-01-26
Supplement: pone.0170795.s010.pdf [file pone.0170795.s010.pdf]

| <b>Predictors</b> (training session/pre-test)                                            | <b>Controls (n=6)</b><br>correlation (p-value) | <b>Neurofeedback (n=7)</b><br>correlation ( p-value) |
|------------------------------------------------------------------------------------------|------------------------------------------------|------------------------------------------------------|
| <b>Predicting general task performance (mean activation level across session)</b>        |                                                |                                                      |
| Motion (mean displacement)                                                               | 0.03 (p = 0.97)                                | <b>-0.79 (p = 0.03) *</b>                            |
| Motivation (QCM score)                                                                   | 0.03 (p = 0.95)                                | 0.26 (p = 0.58)                                      |
| IQ (WAIS VC/ BD)                                                                         | 0.65 (p = 0.16)                                | -0.11 (p = 0.82)                                     |
| ADHD attention (DSM-IV score)                                                            | -0.22 (p = 0.68)                               | -0.69 (p = 0.09)                                     |
| ADHD impulsivity/hyperactivity (DSM-IV score)                                            | -0.57 (p = 0.23)                               | 0.17 (p = 0.72)                                      |
| Interference (MSIT, interference delay ms)                                               | 0.56 (p = 0.24)                                | -0.27 (p = 0.56)                                     |
| Vigilance (SA-DOTS, false alarms)                                                        | -0.78 (p = 0.06)                               | 0.63 (p = 0.13)                                      |
| Response inhibition (SA-DOTS, % missed)                                                  | -0.60 (p = 0.21)                               | -0.29 (p = 0.53)                                     |
| Response inhibition (SART, % false alarms)                                               | -0.72 (p = 0.11)                               | -0.75 (p = 0.05)                                     |
| Visual WM accuracy (2-back, % accuracy)                                                  | -0.24 (p = 0.64)                               | 0.43 (p = 0.34)                                      |
| Verbal WM (WAIS DS, IQ score)                                                            | 0.23 (p = 0.66)                                | -0.03 (p = 0.95)                                     |
| Verbal WM (WAIS LNS, IQ score)                                                           | 0.39 (p = 0.44)                                | 0.03 (p = 0.96)                                      |
| <b>Predicting improvement over sessions (increase in activation level over sessions)</b> |                                                |                                                      |
| Motion (mean displacement)                                                               | -0.27 (p = 0.60)                               | -0.63 (p = 0.13)                                     |
| Motivation (QCM score)                                                                   | -0.28 (p = 0.59)                               | 0.71 (p = 0.08)                                      |
| IQ (WAIS VC/ BD)                                                                         | 0.67 (p = 0.13)                                | 0.32 (p = 0.48)                                      |
| ADHD attention (DSM-IV score)                                                            | -0.39 (p = 0.45)                               | -0.21 (p = 0.65)                                     |
| ADHD impulsivity/hyperactivity (DSM-IV score)                                            | 0.03 (p = 0.96)                                | -0.37 (p = 0.42)                                     |
| Interference (MSIT, interference delay ms)                                               | 0.65 (p = 0.16)                                | -0.41 (p = 0.37)                                     |
| Vigilance (SA-DOTS, false alarms)                                                        | -0.47 (p = 0.35)                               | 0.52 (p = 0.23)                                      |
| Response inhibition (SA-DOTS, % missed)                                                  | 0.24 (p = 0.65)                                | -0.36 (p = 0.42)                                     |
| Response inhibition (SART, % false alarms)                                               | -0.33 (p = 0.52)                               | <b>-0.80 (p = 0.03) *</b>                            |
| Visual WM accuracy (2-back, % accuracy)                                                  | 0.40 (p = 0.43)                                | <b>0.86 (p = 0.01) *</b>                             |
| Verbal WM (WAIS DS, IQ score)                                                            | -0.34 (p = 0.51)                               | 0.28 (p = 0.54)                                      |
| Verbal WM (WAIS LNS, IQ score)                                                           | -0.24 (p = 0.65)                               | 0.46 (p = 0.30)                                      |

| <b>Predicting <i>improvement in differential modulation</i> (increase in differential activation)</b> |                  |                            |
|-------------------------------------------------------------------------------------------------------|------------------|----------------------------|
| Motion (mean displacement)                                                                            | -0.31 (p = 0.54) | -0.65 (p = 0.12)           |
| Motivation (QCM score)                                                                                | -0.55 (p = 0.26) | 0.21 (p = 0.65)            |
| IQ (WAIS VC/ BD)                                                                                      | 0.72 (p = 0.10)  | 0.10 (p = 0.82)            |
| ADHD attention (DSM-IV score)                                                                         | -0.67 (p = 0.15) | -0.20 (p = 0.67)           |
| ADHD impulsivity/hyperactivity (DSM-IV score)                                                         | -0.05 (p = 0.93) | 0.09 (p = 0.85)            |
| Interference (MSIT, interference delay ms)                                                            | -0.29 (p = 0.57) | -0.19 (p = 0.68)           |
| Vigilance (SA-DOTS, false alarms)                                                                     | -0.08 (p = 0.88) | 0.003 (p = 0.99)           |
| Response inhibition (SA-DOTS, % missed)                                                               | 0.05 (p = 0.93)  | <b>-0.91 (p = 0.005) *</b> |
| Response inhibition (SART, % false alarms)                                                            | -0.10 (p = 0.85) | -0.47 (p = 0.28)           |
| Visual WM accuracy (2-back, % accuracy)                                                               | 0.68 (p = 0.13)  | 0.62 (p = 0.14)            |
| Verbal WM (WAIS DS, IQ score)                                                                         | 0.58 (p = 0.23)  | <b>0.81 (p = 0.03) *</b>   |
| Verbal WM (WAIS LNS, IQ score)                                                                        | 0.16 (p = 0.77)  | <b>0.80 (p = 0.03) *</b>   |
