# Supplementary material for: fMRI Neurofeedback Training for Increasing Anterior Cingulate Cortex Activation in Adult Attention Deficit Hyperactivity Disorder. An Exploratory Randomized, Single-Blinded Study
Source: PLoS One. 2017 Jan 26;12(1):e0170795. doi: 10.1371/journal.pone.0170795 (PMC5270326; doi:10.1371/journal.pone.0170795)
Supplement: S3 File — This file contains the activation levels (beta estimates) per individual and functional run during training, derived from the individually defined dACC target regions. (CSV) [file pone.0170795.s007.csv]

group	session1_NF1_50	session1_NF2_50	session1_NF3_50	session1_TR_50	session2_NF1_50	session2_NF2_50	session2_NF3_50	session2_TR_50	session3_NF1_50	session3_NF2_50	session3_NF3_50	session3_TR_50	session4_NF1_50	session4_NF2_50	session4_NF3_50	session4_TR_50	session1_NF1_100	session1_NF2_100	session1_NF3_100	session1_TR_100	session2_NF1_100	session2_NF2_100	session2_NF3_100	session2_TR_100	session3_NF1_100	session3_NF2_100	session3_NF3_100	session3_TR_100	session4_NF1_100	session4_NF2_100	session4_NF3_100	session4_TR_100	session1_MSIT_control	session1_MSIT_inter	session2_MSIT_control	session2_MSIT_inter	session3_MSIT_control	session3_MSIT_inter	session4_MSIT_control	session4_MSIT_inter	session1_MSMC_control	session1_MSMC_inter	session2_MSMC_control	session2_MSMC_inter	session3_MSMC_control	session3_MSMC_inter	session4_MSMC_control	session4_MSMC_inter
1	.096	.243	.232	.106	.258	.325	.547	.353	.193	.261	.152	.13	.138	.37	.265	.079	.128	.551	.349	.205	.182	.151	.665	.319	.189	.174	.068	.209	.199	.433	.305	.246	.184	.525	.278	.317	.382	.531	.343	.398	.005	.18	-.109	.308	-.114	.129	.054	.506
1	.322	.424	-.023	.47	.021	-.354	.046	-.251	-.107	-.017	.04	.04	.04	.04	.04	.04	.179	.217	-.62	-.129	-.143	-.233	.264	-.174	-.101	.073	-.342	-.342	-.342	-.342	-.342	-.342	-.271	-.326	.025	.37	.368	.223	.369	.223	.476	.382	-.328	.357	-.235	.108	-.234	.109
1	.234	.429	.211	.151	.206	.425	.204	.338	.389	.232	.456	.366	.247	.31	.223	.311	.348	.487	.163	.158	.296	.43	.227	.078	.347	.365	.343	.282	-.025	.406	.16	.409	.166	.41	-.133	.003	.13	.133	.413	.88	-.003	.176	-.15	.189	.408	.333	.003	.125
1	.212	-.541	-.293	-.525	.015	.015	.015	.015	.926	.926	.624	.624	.296	.389	.146	-.31	-.411	-.317	-.134	-.085	.584	.584	.584	.584	.809	.809	.124	.124	-.041	.943	-.313	.049	-.07	.007	.303	.54	.303	.54	.777	.726	-.355	.336	-.526	-.243	-.385	.02	-.102	.49
1	.253	.367	.576	-.314	-.322	-.062	-.115	-.288	1.035	.363	-.611	.227	.313	.123	.511	-.103	.102	.615	.341	-.011	-.403	-.019	.161	-.211	.468	.179	.678	.461	.202	.643	1.217	.204	.265	.196	.602	.504	.356	.666	.343	.166	.249	.017	.069	-.113	.604	.281	.437	.721
1	.115	1.026	.484	.504	-.034	-.285	.22	-.441	.706	.098	.251	.553	.231	.753	.075	.857	.067	.71	.521	.387	-.367	-.915	.294	-.71	.571	.067	.293	.6	-.013	.923	.183	1.252	.699	1.244	-.493	-.19	.76	.819	-.603	-.872	.082	1.111	.597	.643	-.169	1.603	-.25	.335
2	.295	-.137	-.046	.168	.235	-.069	-.073	.318	.245	.1	.197	.497	.284	.246	.247	.154	.175	.031	.012	.189	.243	.165	.016	.031	.439	.16	.347	.44	.321	.329	.511	.271	.259	.343	.485	.512	.054	.143	.464	.368	.306	.018	.141	.297	.439	.262	.608	.295
2	.338	-.22	-.183	-.12	-.042	-.227	.329	-.246	.283	.232	-.24	-.228	.046	.046	.046	.046	-.104	-.417	-.387	.522	-.027	-.339	-.124	-.915	-.242	.049	-.065	.033	-.216	-.216	-.216	-.216	-.121	.427	-.283	-.004	-.42	-.205	.026	-.111	-.078	-.945	-.564	-.536	.204	.046	.231	.431
2	.425	.263	-.187	-.152	.038	-.11	-.079	-.538	.204	.116	-.028	-.028	.116	.116	.116	.116	.44	.316	.154	-.203	.247	.024	.168	-.32	.061	.08	-.063	-.063	.08	.08	.08	.08	.148	.295	.069	.228	.257	.361	.257	.361	-.155	.069	.434	.56	.113	.43	.113	.43
2	-.264	.079	.113	-.018	.135	.226	.287	.077	1.021	.809	.311	.581	.822	.879	.722	.378	-.342	-.017	.201	-.079	.155	-.109	.298	.267	.794	.592	.316	.702	.876	.97	.771	.667	.265	.219	.133	.133	.676	.571	.455	.714	-.279	.001	-.182	.251	.199	.708	.023	.491
2	.164	.317	.124	.135	-.119	-.096	-.152	-.166	.283	.131	-.027	-.147	-.095	.059	-.048	.045	.171	.166	.224	.26	-.072	-.074	.098	-.12	.204	.254	.185	-.254	.108	-.094	.052	.157	.045	.273	-.172	-.109	.122	.124	.159	.172	.05	.138	.004	-.024	.357	.22	.041	.336
2	.095	.14	.023	.1	.248	.144	.176	.219	.053	.091	.25	.018	.19	.1	.11	.043	.09	.217	.184	.167	.434	.194	.256	.241	.363	.398	.475	.225	.381	.28	.183	.116	.571	.604	.386	.417	.451	.597	.393	.448	-.195	.292	.097	.362	.189	.47	.072	.356
2	.02	.364	.251	.028	.095	.036	.178	-.035	.185	.311	.119	.279	.209	.14	.071	.077	-.097	.353	.116	.373	-.244	.048	.104	-.034	.142	-.081	-.203	.329	.256	.038	.152	.183	.646	.501	.74	.651	.437	.809	.528	.707	.434	.715	.215	.61	-.065	.427	.1	.32
