# Supplementary material for: fMRI Neurofeedback Training for Increasing Anterior Cingulate Cortex Activation in Adult Attention Deficit Hyperactivity Disorder. An Exploratory Randomized, Single-Blinded Study
Source: PLoS One. 2017 Jan 26;12(1):e0170795. doi: 10.1371/journal.pone.0170795 (PMC5270326; doi:10.1371/journal.pone.0170795)
Supplement: S4 File — This file contains all clinical and neuropsychological data (per individual) from the behavioral assessment administered pre- and post-training, as well as the motivational data collected during each training session. (CSV) [file pone.0170795.s008.csv]

group	attention_pre	impulsivity_pre	fear_1	challenge_1	interest_1	mastery_1	fear_2	challenge_2	interest_2	mastery_2	fear_3	challenge_3	interest_3	mastery_3	fear_4	challenge_4	interest_4	mastery_4	pre_WAIS_CR	pre_WAIS_CLN	pre_SAD_misses	pre_SAD_falseAlarm	pre_SART_falseAlarm_1	pre_MSIT_diff_RT	pre_nback_correct_minus_false_alarm	attention_post	impulsivity_post	post_WAIS_CR	post_WAIS_CLN	post_SAD_misses	post_SAD_falseAlarm	post_SART_falseAlarm_1	post_MSIT_diff_RT	post_nback_correct_minus_false_alarm
1	8	8	3	6	6	6	2	6	7	5	2	6	7	6	2	7	6	6	110	100	.28	-.88	.17	418	.8	5	6	105	100	.6	-.88	.33	235	.84
1	9	3	3	6	5	4	4	5	3	4	3	5	5	5	4	5	3	5	100	105	3.32	.09	.42	336	.79	5	3	100	95	1.9	.42	.25	283	.9
1	7	7	3	6	6	6	2	5	5	6	2	5	5	6	2	5	5	6	80	85	9.57	.8	.5	392	.4	7	3	100	90	5.59	.67	.58	289	.47
1	6	4	3	7	6	5	2	6	5	4	1	6	5	6	1	6	5	6	95	105	2.25	3.215	0	323	.93	8	5	115	105	.01	.86	.17	259	.95
1	7	6	5	6	5	4	2	6	5	7	2	6	5	7	1	6	5	7	95	100	3.75	1.335	.67	459	.47	6	6	100	110	-.03	.05	.42	431	.73
1	6	9	2	6	6	6	4	6	6	6	3	5	6	6	2	5	5	6	95	95	-1.26	1.485	.08	291	.69	6	9	100	100	-.55	-1.34	.17	275	.74
1	6	8	4	7	7	3	3	7	7	4	3	6	7	5	4	6	7	4	100	105	1.65	-.48	.33	336	.62	5	8	85	100	.36	-.68	.25	259	.67
2	9	9	1	6	6	6	1	7	6	7	1	6	5	6	1	5	4	5	80	105	.75	1.44	.25	375	.55	9	5	105	110	.12	.175	0	334	.81
2	7	9	1	6	4	6	1	5	6	6	1	5	4	6	3	4	4	6	100	100	3.1	4.63	.83	329	.7	6	8	100	85	1.25	3.8	.67	277	.6
2	7	3	4	5	6	5	2	4	5	6	1	4	6	5	2	3	5	6	115	110	.68	.38	.17	387	.35	6	3	130	100	.69	-.695	.25	231	.35
2	5	6	2	4	5	5	2	5	5	5	2	4	4	5	3	5	5	6	90	105	2.23	-.87	.33	390	.75	3	4	100	100	.87	.12	.42	272	.76
2	5	7	2	6	4	4	3	5	3	5	2	5	3	5	2	5	3	5	120	105	2.06	1.78	.33	356	.82	9	8	125	120	.41	1.49	.75	300	.77
2	5	3	3	4	4	4	4	4	3	4	4	4	4	3	4	3	4	4	120	130	-.69	-1.34	.25	325	.65	7	2	105	110	3.64	1.82	.33	227	.79
